# Supplementary material for: Optimising hydrogen production via solar acetic acid photoreforming on Cu/TiO2
Source: Royal Society of Chemistry journal article supplement (doi:10.1039/c8cy02349b), 2019-01-01
Supplement: c8cy02349b1.pdf [file c8cy02349b1.pdf]

## Electronic Supplementary Material

### Optimising hydrogen production via solar acetic acid photoreforming on Cu/TiO<sub>2</sub>

Mikel Imizcoz, Alberto V. Puga

#### S1 Materials

Titanium dioxide (Aeroxide® TiO<sub>2</sub> P25) was sourced by Evonik. Hydrogen hexachloroplatinate(IV) hydrate (≥ 99.9% free of trace metals), hydrogen tetrachloroaurate(III) trihydrate (≥ 99.9% free of trace metals), silver nitrate (> 99%), copper(II) nitrate hemi(pentahydrate) (98%) and acetic acid (≥ 99.8%) were supplied by Sigma-Aldrich and used as received. Methanol (reagent grade, ≥ 99.9%) was supplied by Scharlau and used as received. Ultra-pure water was obtained using a Milli-Q® purification system. Argon (≥ 99.995%) and synthetic air (79% N<sub>2</sub>, 21% O<sub>2</sub>) were supplied by Abelló Linde.

#### S2 Synthesis of photocatalysts

The  $M(X\%)/\text{TiO}_2$  ( $M = \text{Pt, Au, Ag or Cu}$ ;  $X$ : nominal  $M/\text{TiO}_2$  %wt loading) photocatalysts used in this work were prepared by the photodeposition method. In a typical procedure, TiO<sub>2</sub> (200 mg) was dispersed in ultra-pure water (25 mL) containing the desired amounts of metallic precursor and methanol, as detailed in Table S1. The suspensions were sonicated for 10 min and then transferred to cylindrical quartz cells (diameter ≈ 44 mm, volume ≈ 50 mL, equipped with a gas inlet valve, a gas outlet valve and a pressure gauge). The cells were evacuated under vacuum (≈ 10 mbar, 2 min) and then purged with argon (pressurising up to 2 bar and depressurising, five cycles). The cells were loaded with argon (1.5 bar) and the stirred (500 min<sup>-1</sup>) suspensions irradiated under UV-vis light from a mercury lamp (125 W, irradiance ≈ 1.5 kW m<sup>-2</sup>, measured employing a calibrated photodiode) for 3 h. The suspensions turned from off-white to intense colours at the end of the photodeposition processes. The solids were separated by filtration using polyamide membrane filters (Whatman®, pore size = 0.45 μm), washed with ultra-pure water (ca. 0.3 L) and dried under a stream of air by suction. The resulting pastes were further dried under vacuum (≈ 10 mbar) at room temperature until constant weight to obtain the final  $M(X\%)/\text{TiO}_2$  photocatalysts (Table S1). Images of the suspensions during preparation, of the isolated solid, and of the re-suspension in CH<sub>3</sub>COOH/H<sub>2</sub>O are shown in Fig. S7.

**Table S1** Synthetic details for the preparation of  $M(X\%)/\text{TiO}_2$  ( $M = \text{Pt, Au, Ag or Cu}$ ;  $X$ : nominal  $M/\text{TiO}_2$  %wt loading) photocatalysts.

| photocatalyst            | metallic precursor                                                               | methanol amount/mg | colour    |
|--------------------------|----------------------------------------------------------------------------------|--------------------|-----------|
| Pt(1%)/TiO <sub>2</sub>  | H <sub>2</sub> Cl <sub>6</sub> Pt·6H <sub>2</sub> O                              | 80                 | grey      |
| Au(1%)/TiO <sub>2</sub>  | HAuCl <sub>4</sub> ·3H <sub>2</sub> O                                            | 80                 | purple    |
| Ag(1%)/TiO <sub>2</sub>  | AgNO <sub>3</sub>                                                                | 80                 | purple    |
| Cu(1%)/TiO <sub>2</sub>  | Cu(NO <sub>3</sub> ) <sub>2</sub> · <sup>5</sup> / <sub>2</sub> H <sub>2</sub> O | 80                 | pale blue |
| Cu(3%)/TiO <sub>2</sub>  | Cu(NO <sub>3</sub> ) <sub>2</sub> · <sup>5</sup> / <sub>2</sub> H <sub>2</sub> O | 236                | pale blue |
| Cu(10%)/TiO <sub>2</sub> | Cu(NO <sub>3</sub> ) <sub>2</sub> · <sup>5</sup> / <sub>2</sub> H <sub>2</sub> O | 780                | grey-blue |

### S3 Photocatalyst characterisations

Metallic contents were determined by inductively coupled plasma (ICP) analyses performed on a Varian 715-ES ICP Optical Emission Spectrometer after dissolution of the samples in aqueous HF/HNO<sub>3</sub>/HCl (1:1:3) mixtures. In the case of silver, ICP did not provide satisfactory results due to the formation of precipitates or deposits during dissolution, and therefore, elemental analyses were performed by means of field emission scanning electron microscopy coupled to energy dispersive X-ray spectroscopy (FESEM-EDX) on a JEOL 7001F microscope equipped with an Oxford Instruments detector, after depositing a layer of powdered sample on carbon tape; elemental percentages were averaged over a number of measurements on different areas of the specimen. X-ray diffraction (XRD) measurements were performed by means of a PANalytical Cubix'Pro diffractometer equipped with an X'Celerator detector and automatic divergence and reception slits using Cu-K<sub>α</sub> radiation (0.154056 nm). The mean size of the ordered (crystalline) domains ( $\phi$ ) was estimated using the Scherrer equation. Transmission electron microscopy (TEM) images were taken on JEOL 2100F microscope operating at 200 kV both in high-resolution transmission (HRTEM) and scanning-transmission (STEM) modes, coupled with an Inca Energy TEM 200 (Oxford) energy dispersive X-ray (EDX) spectroscope for elemental analyses. STEM images were obtained using a High Angle Annular Dark Field (HAADF) detector, which allows Z-contrast imaging. Samples were deposited on carbon-coated nickel grids. The sizes of metal co-catalyst nanoparticles and standard deviations were calculated by determining diameters for a minimum of forty particles in STEM images by using the Image J software. UV-vis absorption spectra were recorded by diffuse reflectance UV-vis (DRUV-vis) spectroscopy on a Varian Cary 5000 UV-Vis-NIR Spectrophotometer. X-ray photoelectron spectroscopy (XPS) data were collected on a SPECS spectrometer equipped with a 150-MCD-9 detector and using a non-monochromatic Al-K<sub>α</sub> (1486.6 eV) X-ray source. Spectra were recorded at room temperature, using an analyser pass energy of 30 eV, an X-ray power of 50 W and under an operating pressure of 10<sup>-9</sup> mbar. During data processing of the XPS spectra, binding energy (BE) values were referenced to the C1s signal (284.5 eV). Spectra treatment was performed using the CASA software.

## S4 Photocatalytic reactions

S4.1 *Conventional procedure.* In a typical experiment, the photocatalyst powder (25 mg) was suspended in a CH<sub>3</sub>COOH/H<sub>2</sub>O mixture (1:1 by volume, 25 mL) by sonication for 10 min. The resulting suspension was then transferred to a cylindrical quartz reactor (see details in Section S2). The cell was evacuated under vacuum ( $\approx 10$  mbar, 2 min) and then purged with argon (pressurising up to 2 bar and depressurising for five cycles), and finally loaded with argon (1.5 bar). The suspension was stirred ( $500 \text{ min}^{-1}$ ) and irradiated using a solar simulator (ThermoOriël 91192-1000, equipped with a 1000 W Xe lamp and an AM1.5G filter to simulate the spectrum of sunlight; irradiance  $\approx 1.0 \text{ kW m}^{-2}$ ). Gas phase samples ( $2 \text{ cm}^3$ ) were taken and analysed on a two-channel chromatograph (Agilent 490 Micro GC, carrier gas: Ar) equipped with thermal conductivity detectors (TCD), and a MS 5 Å column (first channel) for the quantification of H<sub>2</sub>, and a PoraPLOT Q column (second channel) for the quantification of CH<sub>4</sub>, CO<sub>2</sub> and C<sub>2</sub>H<sub>6</sub>.

S4.2 *Procedure using in situ photodeposited photocatalysts.* The photocatalytic experiments performed using *in situ* photodeposited Cu(3%)/TiO<sub>2</sub> (<sup>15</sup>Cu(3%)/TiO<sub>2</sub>) were carried out by directly irradiating a stirred ( $500 \text{ min}^{-1}$ ) suspension of TiO<sub>2</sub> (24.3 mg) in a CH<sub>3</sub>COOH/H<sub>2</sub>O mixture (1:1 by volume, 25 mL) containing the appropriate amount of Cu(NO<sub>3</sub>)<sub>2</sub>·5/2H<sub>2</sub>O (2.7 mg, 3% Cu relative to TiO<sub>2</sub> by weight) under UV-vis light from a mercury lamp (125 W, irradiance  $\approx 1.5 \text{ kW m}^{-2}$ ) for 3 h, in an analogous fashion to the synthetic procedure described above (S4.1). The suspension was deep purple at the end of this photodeposition process. The cell was then evacuated under vacuum ( $\approx 10$  mbar, 2 min), purged, pressurised with argon, and ultimately irradiated under simulated sunlight in a similar way to the conventional procedure described in Section S4.1 above.

S4.3 *Procedure under monochromatic light for photonic efficiency determination.* A suspension of <sup>15</sup>Cu(3%)/TiO<sub>2</sub>, prepared as described in Section S4.2 above. The resulted purple suspension was irradiated under light at 350 nm by using a Czerny-Turner-type Microbeam monochromator equipped with a 150 W Xe lamp, and powered by a Pluton Technology International LPS 220B power supply. Irradiances were measured employing a calibrated photodiode.

S4.4 *Redox cycling procedure.* In order to study the effect of the oxidation state of copper on the selectivity of the solar photocatalytic transformation of aqueous acetic acid, redox cycling experiments were performed by photoreduction under UV-vis irradiation or deliberate oxidation under air, as detailed herein. The initial cycle (*#ox1*) was performed as for the conventional procedure described above, using Cu(3%)/TiO<sub>2</sub> (25.0 mg, comprising mainly oxidised copper species as the co-catalyst, see main text for discussion), and a CH<sub>3</sub>COOH/H<sub>2</sub>O mixture (1:1 by volume, 25 mL), under simulated sunlight irradiation (AM1.5G, irradiance  $\approx 1.0 \text{ kW m}^{-2}$ ) for 3 h. The second cycle (*#red1*) was performed after a photoreduction treatment of the reaction suspension by evacuating the gaseous headspace of the cell ( $\approx 10$  mbar, 5 min), refilling with Ar (1.5 bar) and irradiating the suspension under

UV-vis (Hg lamp, 125 W, irradiance  $\approx 1.5 \text{ kW m}^{-2}$ ) for 3 h, whereby the suspension turned into a bright purple-pink colour. Then, the solar irradiation process was carried out as detailed above during the #ox1 cycle. The third cycle (#ox2) was done after deliberate oxidation under synthetic air flow (bubbling at  $5 \text{ mL min}^{-1}$ , 1 h), until the purple-pink colour of the suspension faded to off-white. Then, the solar irradiation process was carried out as for the previous cycles. The final cycle (#red2) was carried out after another photoreduction procedure identical to that used before the #red1 cycle, also resulting in a bright purple-pink suspension. Images of the suspensions, and related results of the photocatalytic reactions are displayed in Fig. 4.

**Table S2** Metallic loading for the  $M(X\%)/\text{TiO}_2$  photocatalysts relative to the experimentally measured amount of  $\text{TiO}_2$ , as determined by either ICP or FESEM-EDX.

| photocatalyst           | loading( $M$ )/% | standard deviation/% | method    |
|-------------------------|------------------|----------------------|-----------|
| Pt(1%)/ $\text{TiO}_2$  | 0.87             | -                    | ICP       |
| Au(1%)/ $\text{TiO}_2$  | 1.06             | -                    | ICP       |
| Ag(1%)/ $\text{TiO}_2$  | 1.38             | 0.35                 | FESEM-EDX |
| Cu(1%)/ $\text{TiO}_2$  | 0.97             | -                    | ICP       |
| Cu(3%)/ $\text{TiO}_2$  | 3.18             | -                    | ICP       |
| Cu(10%)/ $\text{TiO}_2$ | 11.11            | -                    | ICP       |

**Table S3** Amounts of gaseous products formed upon short-time simulated sunlight irradiation of aqueous acetic acid using  $M(1\%)/\text{TiO}_2$  photocatalysts.<sup>a</sup>

| $M$                    | produced amounts/ $\mu\text{mol}$ |               |               |                        | $\text{H}_2/\text{CH}_4$ |
|------------------------|-----------------------------------|---------------|---------------|------------------------|--------------------------|
|                        | $\text{H}_2$                      | $\text{CH}_4$ | $\text{CO}_2$ | $\text{C}_2\text{H}_6$ |                          |
| none                   | 0.7                               | 11.8          | 7.0           | < 0.1                  | 0.06                     |
| Pt                     | 33.5                              | 84.0          | 45.7          | 0.9                    | 0.40                     |
| Au                     | 0.6                               | 14.1          | 8.7           | 0.2                    | 0.04                     |
| Ag                     | 0.2                               | 14.1          | 8.2           | < 0.1                  | 0.01                     |
| Cu                     | < 0.1                             | 97.6          | 48.1          | 0.2                    | < 0.01                   |
| Cu (dark) <sup>b</sup> | -                                 | -             | -             | -                      | -                        |

<sup>a</sup> Reaction conditions:  $\text{CH}_3\text{COOH}/\text{H}_2\text{O}$  (1:1 v/v, 25 mL), suspended  $M/\text{TiO}_2$  (25 mg), simulated sunlight irradiation (AM1.5G,  $100 \text{ mW cm}^{-2}$ ),  $t = 2 \text{ h}$ . <sup>b</sup> Reaction performed using identical conditions as for the other entries, but in the absence of irradiation.

**Table S4** Comparison of literature data and data from this work on the photocatalytic transformation of acetic acid (plus formic acid to extend the scope to the simplest carboxylic acid) in irradiated aqueous suspensions of Cu/TiO<sub>2</sub> and related photocatalysts. Since literature data on Cu/TiO<sub>2</sub> is scarce and only related to irradiations under UV-rich light (e.g. from Hg lamps), only a qualitative comparison to the systems reported in this work can be done. Literature data using other metal co-catalysts in similar photocatalytic systems can be found and are listed below, showing that the performance is similar for Pt, Au or Ag, and that H<sub>2</sub> selectivity is in general moderate due to the prevalence of decarboxylation unless basic media are employed.

| photocatalyst                     | co-catalyst<br>deposition method    | reaction medium                                                           | light source          | P/W or<br>(I/mW cm <sup>-2</sup> ) | T/°C | production rates/μmol g <sub>cat</sub> <sup>-1</sup> h <sup>-1</sup> |                 |                 |                               | reference |
|-----------------------------------|-------------------------------------|---------------------------------------------------------------------------|-----------------------|------------------------------------|------|----------------------------------------------------------------------|-----------------|-----------------|-------------------------------|-----------|
|                                   |                                     |                                                                           |                       |                                    |      | H <sub>2</sub>                                                       | CO <sub>2</sub> | CH <sub>4</sub> | C <sub>2</sub> H <sub>6</sub> |           |
| Cu/TiO <sub>2</sub> (anatase)     | Cu <sup>2+</sup> in reaction medium | HCOOH<br>(aq, 1 M) <sup>[a]</sup>                                         | UV                    | 125                                | 25   | 2500 <sup>[b]</sup>                                                  | -               | -               | -                             | 1         |
| Pt(0.5%)/Cu <sub>2</sub> O        | photodeposition                     | HCOOH<br>(aq, 2.5 M, pH 5) <sup>[c]</sup>                                 | halogen<br>(> 420 nm) | (280)                              | -    | 155                                                                  | 158             | -               | -                             | 2         |
| Cu <sub>2</sub> O                 | -                                   | HCOOH<br>(aq, 2.5 M, pH 5) <sup>[c]</sup>                                 | halogen<br>(> 420 nm) | (280)                              | -    | 65                                                                   | 64              | -               | -                             | 2         |
| Cu(10%)/TiO <sub>2</sub>          | mechanical mixing                   | CH <sub>3</sub> COOH<br>(aq, 1 M)                                         | Hg                    | -                                  | 25   | 144                                                                  | 640             | 590             | 66                            | 3         |
| CuO(33.3%)-SnO <sub>2</sub>       | precipitation-<br>calcination       | CH <sub>3</sub> COOH<br>(aq, 0.04 M)                                      | Hg                    | 300                                | 45   | 6473 <sup>[b]</sup>                                                  |                 |                 |                               | 4         |
| CuO(33.3%)-SnO <sub>2</sub>       | precipitation-<br>calcination       | CH <sub>3</sub> COOH<br>(aq, 0.04 M)                                      | Hg                    | 300                                | 45   | 17904 <sup>[b]</sup>                                                 |                 |                 |                               | 4         |
| Pt(7%)/TiO <sub>2</sub> (rutile)  | photodeposition                     | H <sub>2</sub> O/CH <sub>3</sub> COOH<br>(l, 6:1, pH 2.1) <sup>[c]</sup>  | Xe<br>(> 320 nm)      | 500                                | -    | 77                                                                   | -               | 397             | -                             | 5         |
| Pt(7%)/TiO <sub>2</sub> (rutile)  | photodeposition                     | H <sub>2</sub> O/ CH <sub>3</sub> COOH<br>(l, 6:1, pH 8.8) <sup>[c]</sup> | Xe<br>(> 320 nm)      | 500                                | -    | 367                                                                  | -               | 2               | -                             | 5         |
| Pt(7%)/TiO <sub>2</sub> (anatase) | photodeposition                     | Na[CH <sub>3</sub> COO]<br>(aq, 1.7% w/v, pH = 7.4) <sup>[c]</sup>        | Xe<br>(> 320 nm)      | 500                                | -    | 165                                                                  | 27              | 0.24            | -                             | 5         |
| Pt(0.5%)/TiO <sub>2</sub> (P25)   | impregnation-<br>reduction          | CH <sub>3</sub> COOH<br>(aq, 0.87 mM)                                     | solar simulator       | 280                                | 40   | 278 <sup>[b]</sup>                                                   | -               | -               | -                             | 6         |
| Pt(1%)/TiO <sub>2</sub> (P25)     | impregnation-<br>sonication         | CH <sub>3</sub> COOH<br>(aq, 0.5 M, pH = 2) <sup>[d]</sup>                | Xe                    | 1000                               | 25   | 440                                                                  | 1280            | 640             | 26                            | 7         |
| Pt(1%)/TiO <sub>2</sub> (P25)     | impregnation-<br>sonication         | CH <sub>3</sub> COOH<br>(aq, 0.5 M, pH = 11) <sup>[c]</sup>               | Xe                    | 1000                               | 25   | 100                                                                  | -               | 0.200           | 0.016                         | 7         |
| photocatalyst                     | co-catalyst                         | reaction medium                                                           | light source          | (I/mW cm <sup>-2</sup> )           | T/°C | H <sub>2</sub>                                                       | CO <sub>2</sub> | CH <sub>4</sub> | C <sub>2</sub> H <sub>6</sub> | reference |

|                                              | deposition method              |                                                         |                 |       |    |     |      |      |     |           |  |
|----------------------------------------------|--------------------------------|---------------------------------------------------------|-----------------|-------|----|-----|------|------|-----|-----------|--|
| Pt(1%)/TiO <sub>2</sub> (P25)                | impregnation-sonication        | CH <sub>3</sub> COOH (aq, 0.5 M, pH = 2) <sup>[c]</sup> | Xe              | 1000  | 25 | 955 | 2739 | 1363 | 64  | 8         |  |
| Rh(1%)/TiO <sub>2</sub> (P25)                | photodeposition                | CH <sub>3</sub> COOH (aq, 0.5 M, pH = 2) <sup>[c]</sup> | Xe              | 1000  | 25 | 472 | 1547 | 709  | 35  | 8         |  |
| Au(1%)/TiO <sub>2</sub> (P25)                | photodeposition                | CH <sub>3</sub> COOH (aq, 0.5 M, pH = 2) <sup>[c]</sup> | Xe              | 1000  | 25 | 307 | 1331 | 613  | 53  | 8         |  |
| Ag(1%)/TiO <sub>2</sub> (P25)                | photodeposition                | CH <sub>3</sub> COOH (aq, 0.5 M, pH = 2) <sup>[c]</sup> | Xe              | 1000  | 25 | 77  | 952  | 672  | 16  | 8         |  |
| IrO <sub>2</sub> (1%)/TiO <sub>2</sub> (P25) | impregnation-calcination       | CH <sub>3</sub> COOH (aq, 0.5 M, pH = 2) <sup>[c]</sup> | Xe              | 1000  | 25 | 155 | 2373 | 1563 | 64  | 8         |  |
| RuO <sub>2</sub> (1%)/TiO <sub>2</sub> (P25) | impregnation-calcination       | CH <sub>3</sub> COOH (aq, 0.5 M, pH = 2) <sup>[c]</sup> | Xe              | 1000  | 25 | 245 | 1701 | 744  | 19  | 8         |  |
| TiO <sub>2</sub> (P25)                       | -                              | H <sub>2</sub> O/CH <sub>3</sub> COOH, (l, 1:1)         | solar simulator | (100) | 25 | 14  | 139  | 236  | < 1 | this work |  |
| Pt(1%)/TiO <sub>2</sub> (P25)                | photodeposition                | H <sub>2</sub> O/CH <sub>3</sub> COOH, (l, 1:1)         | solar simulator | (100) | 25 | 670 | 914  | 1680 | 18  | this work |  |
| Au(1%)/TiO <sub>2</sub> (P25)                | photodeposition                | H <sub>2</sub> O/CH <sub>3</sub> COOH, (l, 1:1)         | solar simulator | (100) | 25 | 12  | 174  | 281  | 4   | this work |  |
| Ag(1%)/TiO <sub>2</sub> (P25)                | photodeposition                | H <sub>2</sub> O/CH <sub>3</sub> COOH, (l, 1:1)         | solar simulator | (100) | 25 | 3   | 164  | 282  | < 1 | this work |  |
| Cu(1%)/TiO <sub>2</sub> (P25)                | photodeposition                | H <sub>2</sub> O/CH <sub>3</sub> COOH, (l, 1:1)         | solar simulator | (100) | 25 | < 1 | 962  | 1951 | 4   | this work |  |
| Cu(1%)/TiO <sub>2</sub> (P25)                | photodeposition                | H <sub>2</sub> O/CH <sub>3</sub> COOH, (l, 1:1)         | solar simulator | (100) | 25 | < 1 | 962  | 1951 | 4   | this work |  |
| Cu(3%)/TiO <sub>2</sub> (P25)                | photodeposition                | H <sub>2</sub> O/CH <sub>3</sub> COOH, (l, 1:1)         | solar simulator | (100) | 25 | 2   | 796  | 1595 | 5   | this work |  |
| Cu(10%)/TiO <sub>2</sub> (P25)               | photodeposition                | H <sub>2</sub> O/CH <sub>3</sub> COOH, (l, 1:1)         | solar simulator | (100) | 25 | < 1 | 704  | 1420 | < 1 | this work |  |
| Cu(3%)/TiO <sub>2</sub> (P25)                | <i>in situ</i> photodeposition | H <sub>2</sub> O/CH <sub>3</sub> COOH, (l, 1:1)         | solar simulator | (100) | 25 | 36  | 249  | 199  | 4   | this work |  |

<sup>[a]</sup> The solution also contained HClO<sub>4</sub> (pH = 1) and NaCl (1 M). <sup>[b]</sup> Only H<sub>2</sub> analysed. <sup>[c]</sup> Sodium hydroxide used to adjust pH. <sup>[d]</sup> Perchloric acid used to adjust pH. References:

- 1 V. Lanese, D. Spasiano, R. Marotta, I. Di Somma, L. Lisi, S. Cimino and R. Andreozzi, *Int. J. Hydrogen Energy*, 2013, 38, 9644-9654.
- 2 S. Kakuta and T. Abe, *ACS Appl. Mater. Interfaces*, 2009, 1, 2707-2710.
- 3 A. Heciak, A.W. Morawski, B. Grzmil and S. Mozia, *Appl. Catal., B-Environ.*, 2013, 140, 108-114.
- 4 X.-J. Zheng, Y.-J. Wei, L.-F. Wei, B. Xie and M.-B. Wei, *Int. J. Hydrogen Energy*, 2010, 35, 11709-11718.
- 5 T. Sakata, T. Kawai and K. Hashimoto, *J. Phys. Chem.*, 1984, 88, 2344-2350.
- 6 A. Patsoura, D.I. Kondarides and X.E. Verykios, *Catal. Today*, 2007, 124, 94-102.
- 7 S. Hamid, I. Ivanova, T.H. Jeon, R. Dillert, W.Y. Choi and D.W. Bahnemann, *J. Catal.*, 2017, 349, 128-135.
- 8 S. Hamid, R. Dillert and D.W. Bahnemann, *J. Phys. Chem. C*, 2018, 122, 12792-12809.

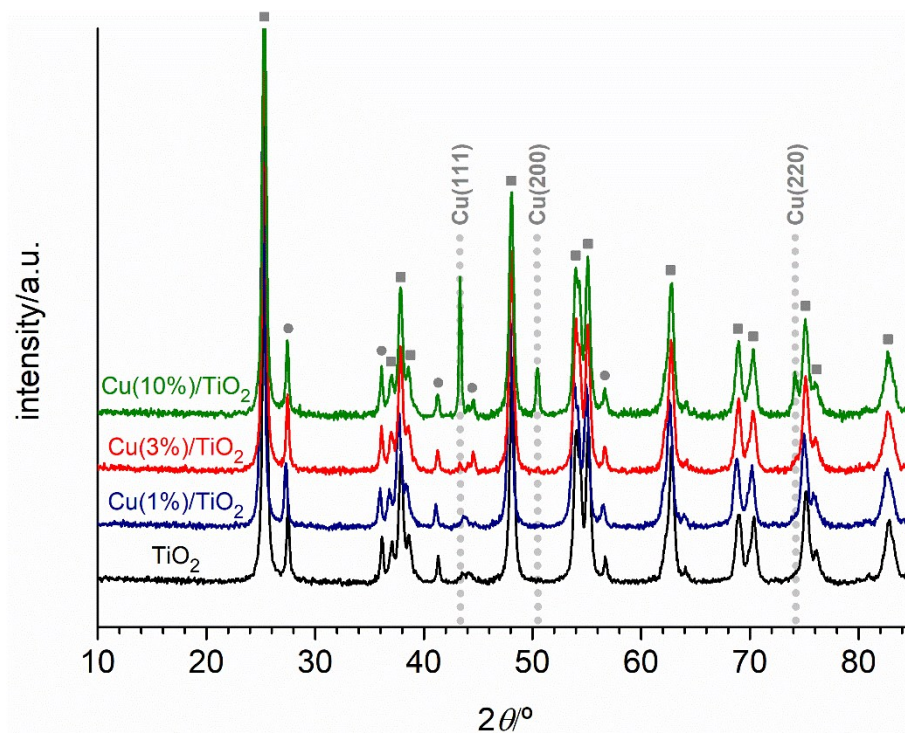

**Fig. S1** XRD of the Cu( $X\%$ )/TiO<sub>2</sub> ( $X = 1, 3$  or  $10$ ) photocatalysts and of the bare TiO<sub>2</sub>. The identified diffraction peaks for metallic copper (face-centred cubic lattice, fcc) are marked by dotted grey lines, and the corresponding planes indicated above them. In any case were diffractions for copper oxide phases observable. In the case of Cu(1%)/TiO<sub>2</sub>, neither were Cu(0) diffractions apparent. In contrast, Cu(0) signals could be clearly seen for the materials with higher copper content. For Cu(3%)/TiO<sub>2</sub>, these were too weak, but in the case of Cu(10%)/TiO<sub>2</sub>, they were strong enough to allow estimation of the particle size according to the Scherrer equation, yielding a value of *ca.* 33 nm. Diffraction peaks corresponding to TiO<sub>2</sub> were identified both for anatase (squares) and rutile (circles) phases.

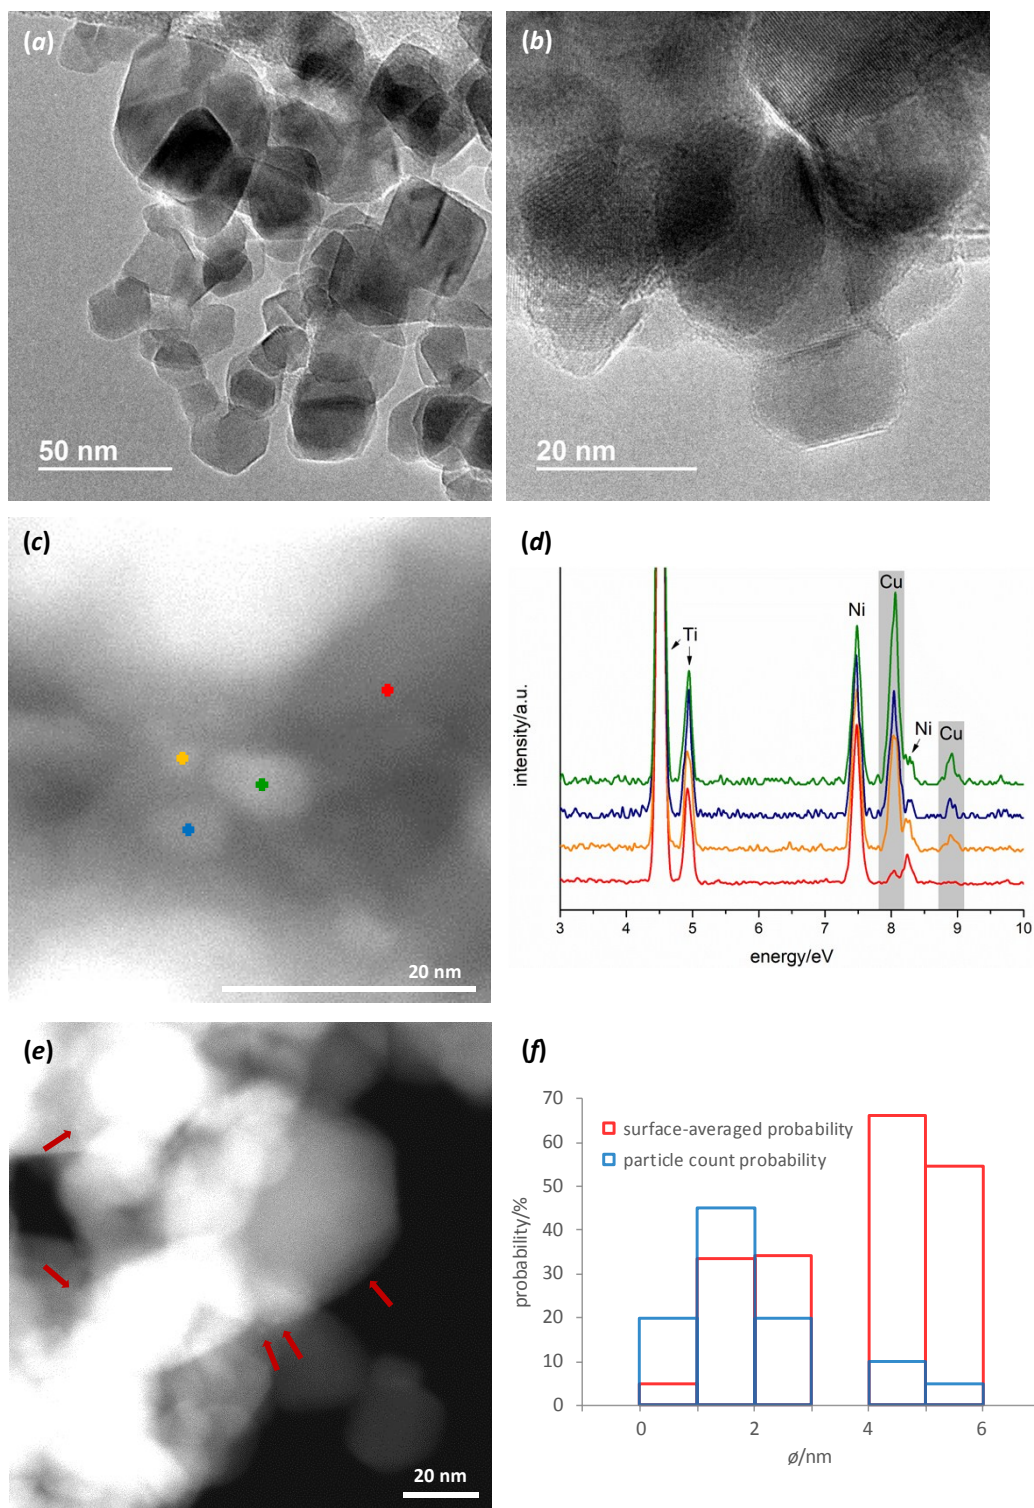

**Fig. S2** TEM images and data for Cu(1%)/TiO<sub>2</sub>. HRTEM images at  $\times 10^5$  and  $\times 3 \times 10^5$  magnification (*a* and *b*, respectively) clearly showing the sizes and morphology of the TiO<sub>2</sub> particles, yet not the copper domains, probably due to their small size and the blunt contrast between Cu and Ti. STEM images at high magnification ( $\times 4 \times 10^6$  and  $\times 1.2 \times 10^6$ , *c* and *e*, respectively) showing the presence of small copper particles (marked by arrows in *e*); EDX spectra (*d*) acquired from the points marked in (*c*) confirmed that the smaller (< 6 nm) particles are mainly formed by copper, whereas the larger TiO<sub>2</sub> particles contain negligible amounts of such metal. The particle distribution histogram is represented as histograms both for particle number and surface-averaged probability (*f*).



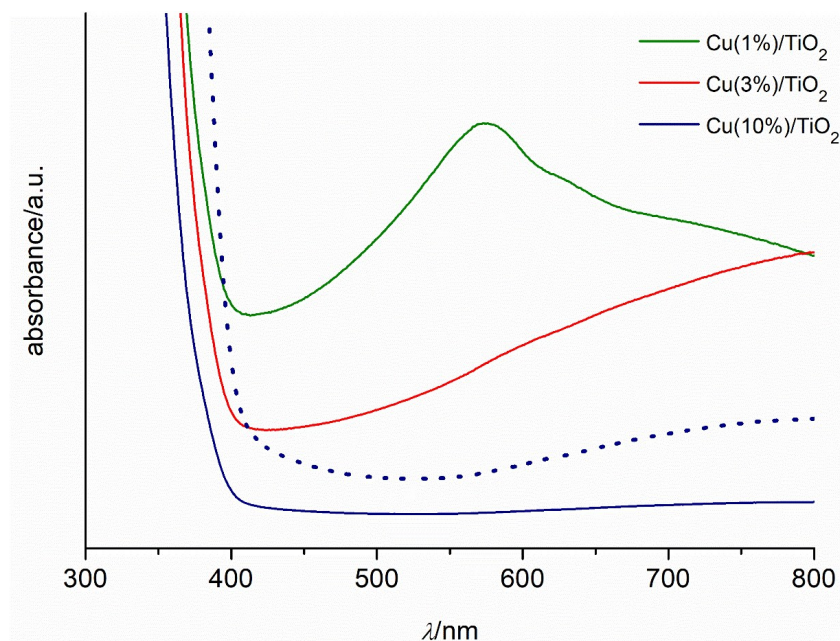

**Fig. S3** DRUV-vis spectra of Cu( $X\%$ )/TiO<sub>2</sub> ( $X = 1, 3$  or  $10$ ) photocatalysts. The intensity for the sample with lower copper loading ( $X = 1$ ) was increased five-fold (dotted line) in order to clearly observe the weak broad band above  $550$  nm. This band is significantly more intense for Cu( $3\%$ )/TiO<sub>2</sub>, whereas the signal corresponding to the localised surface plasmon resonance of Cu( $0$ ) nanoparticles ( $574$  nm) is only clearly visible for Cu( $10\%$ )/TiO<sub>2</sub>.

**Table S5** Amounts of gaseous products formed during simulated sunlight irradiation of aqueous acetic acid using Cu/TiO<sub>2</sub> photocatalysts for increasing lengths of time.<sup>a</sup>

| photocatalyst                                      | t/h  | produced amounts/ $\mu\text{mol}$ |                 |                 |                               | H <sub>2</sub> /CH <sub>4</sub> |
|----------------------------------------------------|------|-----------------------------------|-----------------|-----------------|-------------------------------|---------------------------------|
|                                                    |      | H <sub>2</sub>                    | CH <sub>4</sub> | CO <sub>2</sub> | C <sub>2</sub> H <sub>6</sub> |                                 |
| Cu(1%)/TiO <sub>2</sub>                            | 1.0  | -                                 | 46.7            | 23.6            | 0.1                           | -                               |
|                                                    | 2.0  | -                                 | 85.2            | 41.0            | 0.2                           | -                               |
|                                                    | 4.5  | 0.02                              | 179.1           | 89.6            | 0.7                           | 10 <sup>-4</sup>                |
|                                                    | 7.0  | 0.7                               | 195.1           | 102.9           | 0.8                           | 3 10 <sup>-3</sup>              |
|                                                    | 24   | 4.8                               | 245.9           | 126.6           | 0.9                           | 2 10 <sup>-2</sup>              |
| Cu(3%)/TiO <sub>2</sub>                            | 1.0  | -                                 | 35.9            | 17.1            | -                             | -                               |
|                                                    | 2.0  | 0.1                               | 79.7            | 39.8            | 0.3                           | 10 <sup>-3</sup>                |
|                                                    | 4.5  | 0.3                               | 166.3           | 81.5            | 0.6                           | 2 10 <sup>-3</sup>              |
|                                                    | 7.0  | 0.7                               | 261.7           | 130.7           | 1.1                           | 3 10 <sup>-3</sup>              |
|                                                    | 24.0 | 6.6                               | 637.8           | 319.9           | 5.4                           | 10 <sup>-2</sup>                |
| Cu(10%)/TiO <sub>2</sub>                           | 1.0  | -                                 | 34.2            | 16.7            | -                             | -                               |
|                                                    | 2.0  | -                                 | 71.0            | 35.2            | -                             | -                               |
|                                                    | 4.5  | 0.4                               | 167.0           | 85.0            | 0.7                           | 2 10 <sup>-3</sup>              |
|                                                    | 7.0  | 0.9                               | 214.1           | 110.2           | 1.2                           | 4 10 <sup>-3</sup>              |
|                                                    | 24   | 7.3                               | 656.8           | 336.7           | 6.4                           | 10 <sup>-2</sup>                |
| <sup>15</sup> Cu(3%)/TiO <sub>2</sub> <sup>b</sup> | 1.0  | 1.04                              | 8.51            | 7.79            | 0.2                           | 0.12                            |
|                                                    | 2.5  | 2.33                              | 16.0            | 12.8            | 0.3                           | 0.15                            |
|                                                    | 19.0 | 19.9                              | 126.9           | 79.6            | 1.1                           | 0.16                            |

<sup>a</sup> Experimental conditions as described in Table S3. <sup>b</sup> Experimental conditions as described in Section S4.2 for Cu/TiO<sub>2</sub> generated *in situ*.

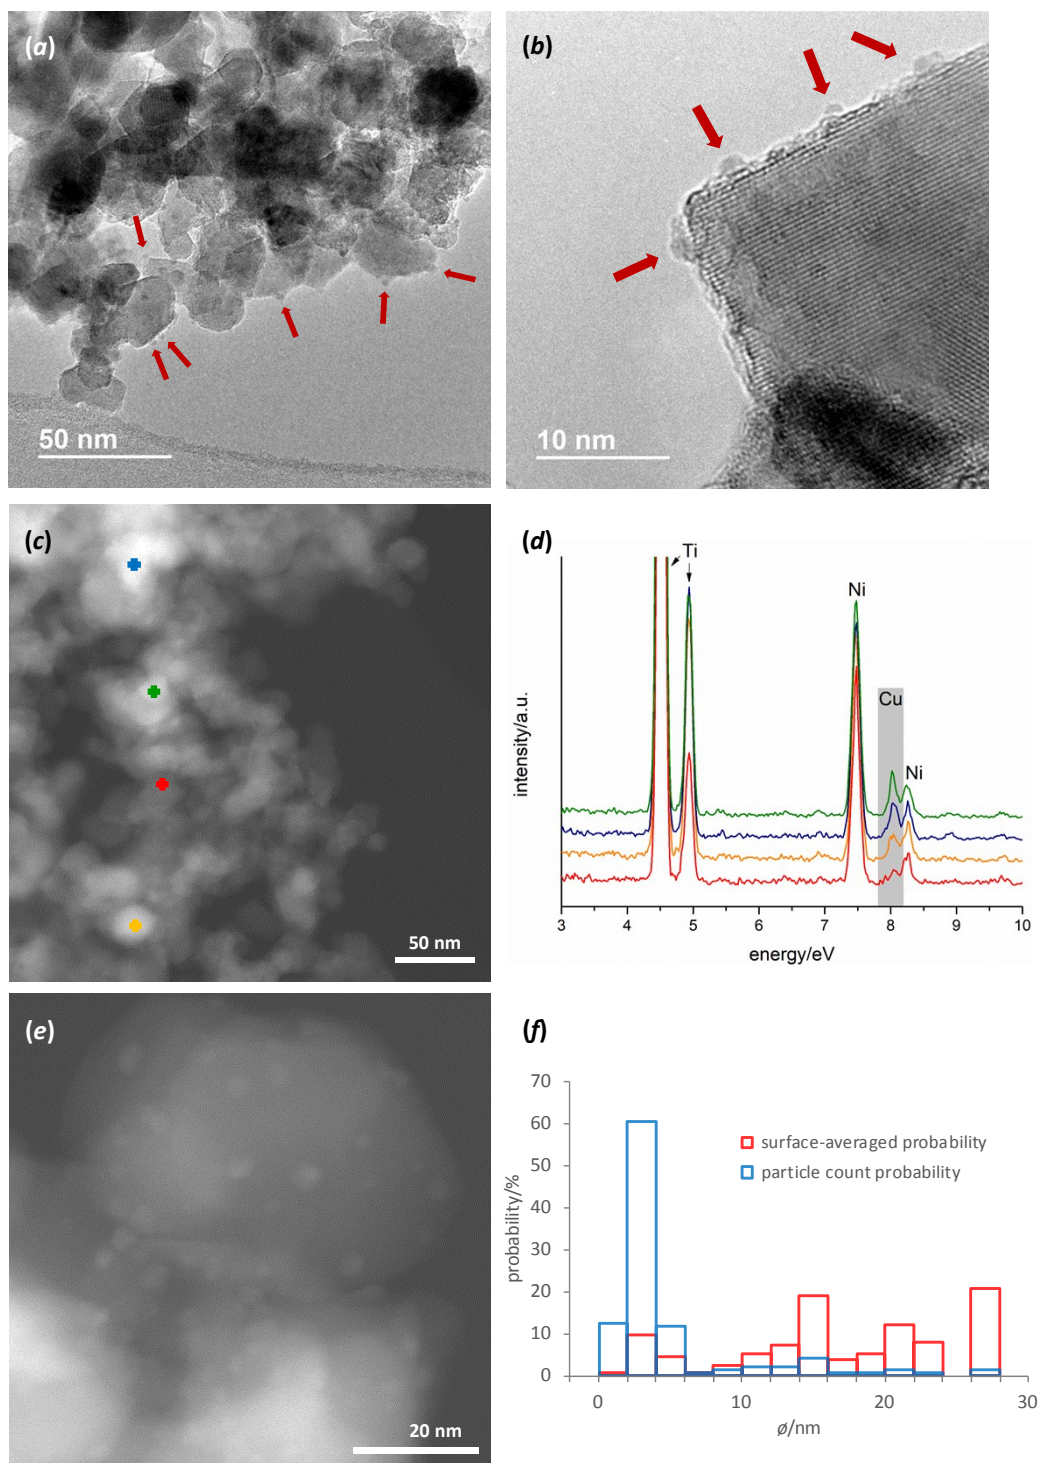

**Fig. S4** TEM images and data for Cu(3%)/TiO<sub>2</sub>. HRTEM images at  $\times 10^5$  and  $\times 5 \cdot 10^5$  magnification (*a* and *b*, respectively) showing the smaller, amorphous, copper nanoparticles (examples marked by arrows) deposited on the larger TiO<sub>2</sub> particles. STEM images at  $\times 5 \cdot 10^5$  and  $\times 2.0 \cdot 10^6$  magnification (*c* and *e*, respectively) showing the presence of copper particles as brighter domains. EDX spectra (*d*) acquired from the spots marked in (*c*) confirmed the presence of copper particles of large sizes (up to  $\approx 30$  nm, see for example, green spot in *c* and green spectrum in *d*) observed as brighter areas, whereas the less bright areas contain titanium yet smaller amounts of copper (see for example, red spot in *c* and red spectrum in *d*). The particle distribution histogram is represented as histograms both for particle number and surface-averaged probability (*f*).

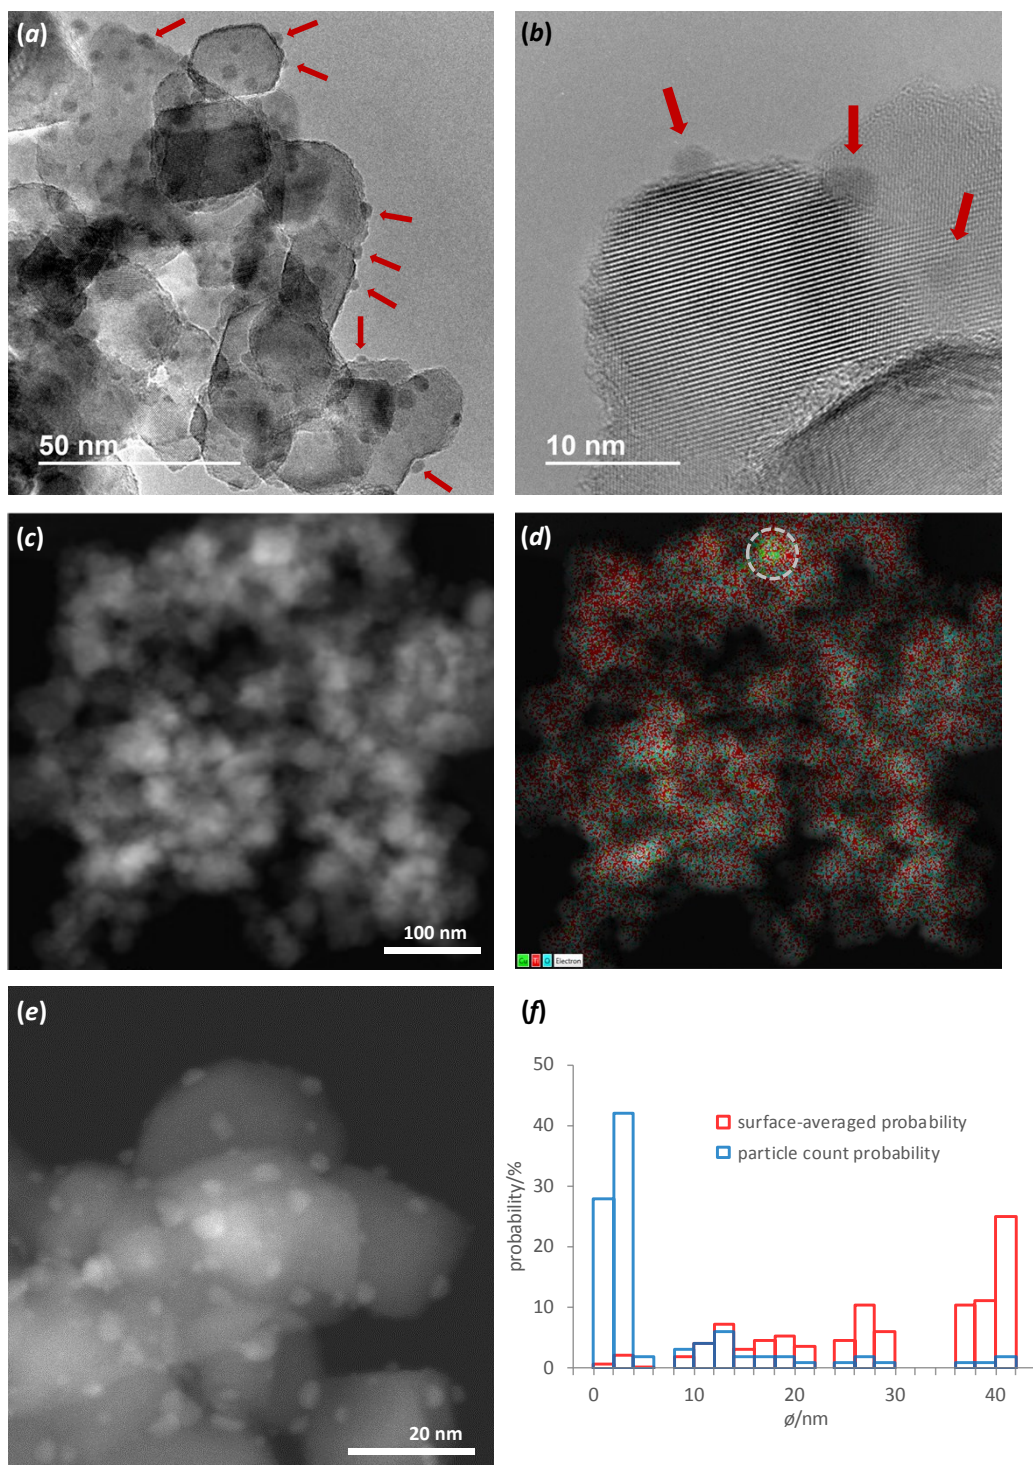

**Fig. S5** TEM images and data for Cu(10%)/TiO<sub>2</sub>. HRTEM images at  $\times 1.5 \cdot 10^5$  and  $\times 5 \cdot 10^5$  magnification (*a* and *b*, respectively) showing the smaller, amorphous, copper nanoparticles (examples marked by arrows) deposited on the larger TiO<sub>2</sub> particles. STEM images at  $\times 3 \cdot 10^5$  and  $\times 2.0 \cdot 10^6$  magnification (*c* and *e*, respectively) showing the presence of copper particles. Overlaying elemental mapping obtained from EDX data (green, Cu; red, Ti; blue, O; *d*) for the site shown in (*c*) proved that large copper particles (up to  $\approx 40$  nm, an example marked inside a dotted circle) were also present in the material in addition to the clearly visible smaller ones (for example, in *e*). The particle distribution histogram is represented as histograms both for particle number and surface-averaged probability (*f*).



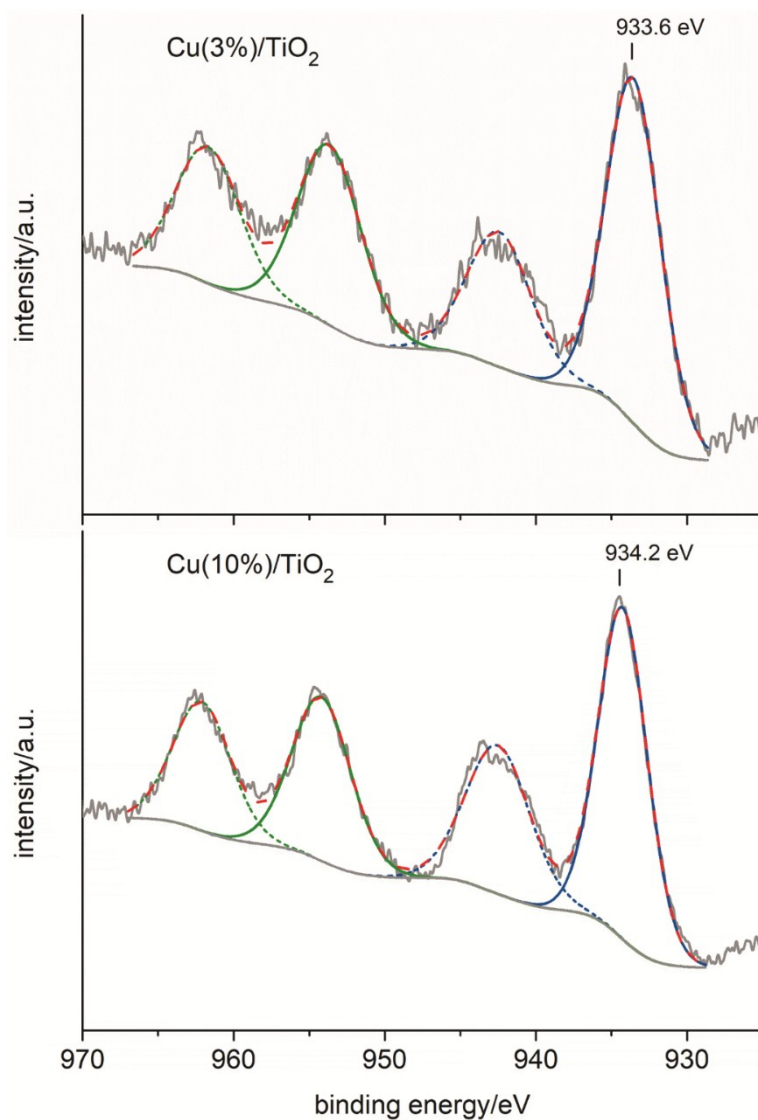

**Fig. S6** Raw Cu2p XPS spectra of Cu(3%)/TiO<sub>2</sub> and Cu(10%)/TiO<sub>2</sub> (grey lines), along with the deconvoluted Cu2p<sub>3/2</sub> and Cu2p<sub>1/2</sub> components (blue and green lines, respectively), and their corresponding satellite signals (dotted blue and green lines, respectively). The sum of all deconvoluted spectra is represented by a dashed red line, whereas the calculated background is represented by the bottom grey line. Both the presence of the satellite signals, and the position of the Cu2p<sub>3/2</sub> peaks above 933.5 eV indicate that the oxidation state of copper in surface layers is 2+.

**Table S6** Apparent photonic efficiencies ( $\Phi_a$ ) for the transformation of aqueous acetic acid using Cu(3%)/TiO<sub>2</sub> generated *in situ* under monochromatic light, and comparison to literature data. Notwithstanding that direct comparison cannot be made owing to the scarcity of data on closely related photocatalysis, a semi-quantitative evaluation of the data listed below reveals that the photonic efficiencies of our system is comparable to literature data. For example, lower efficiencies were reported for the most similar systems found in the prior art (reference 1) using acetic acid as a substrate—albeit at a lower concentration—and TiO<sub>2</sub>—albeit loaded with other metal co-catalysts. Formic acid as a substrate (reference 2) resulted in slightly higher photonic efficiencies—yet the photocatalyst was a sensibly different one, based on CdS. Finally, the use of hydroxyl-containing substrates (references 3–5) has been shown to proceed at notably high photonic efficiencies, due to their propensity to undergo hole-induced oxidation.

| photocatalyst                                            | reaction medium                                            | $\lambda$ /nm | $\Phi_a$ /%    |                 |         | reference |
|----------------------------------------------------------|------------------------------------------------------------|---------------|----------------|-----------------|---------|-----------|
|                                                          |                                                            |               | H <sub>2</sub> | CH <sub>4</sub> | overall |           |
| <sup>15</sup> Cu(3%)/TiO <sub>2</sub> (P25) <sup>b</sup> | H <sub>2</sub> O/CH <sub>3</sub> COOH (1:1)                | 350           | 1.7            | 9.2             | 10.8    | this work |
| Pt(1%)/TiO <sub>2</sub> (P25)                            | CH <sub>3</sub> COOH ( <i>aq</i> , 0.5 M)                  | 365           | 0.9            | 1.4             | 2.3     | 1         |
| IrO <sub>2</sub> (1%)/TiO <sub>2</sub> (P25)             | CH <sub>3</sub> COOH ( <i>aq</i> , 0.5 M)                  | 365           | 0.2            | 1.0             | 1.2     | 1         |
| Ru(0.99%)/CdS(21%)/Al-HMS <sup>c</sup>                   | H <sub>2</sub> O/HCOOH (4:1)                               | 420           |                |                 | 16.6    | 2         |
| Pt(5%)/TiO <sub>2</sub> (rutile)                         | H <sub>2</sub> O/lactic acid (1:1)                         | 360           |                |                 | 71      | 3         |
| Pt(0.5%)/TiO <sub>2</sub> (P25)                          | glycerol ( <i>aq</i> , 1 M)                                | 365           |                |                 | 71      | 4         |
| Cu/TiO <sub>2</sub> (mesoporous) <sup>d</sup>            | CH <sub>3</sub> CH <sub>2</sub> OH/H <sub>2</sub> O (95:5) | ?             |                |                 | ≈ 50    | 5         |

<sup>b</sup> Apparent photonic efficiencies calculated as follows:  $\Phi = 100 * [n(e^-)/n(\text{photons})]$ , where  $n(e^-)$  is the number (moles) of electrons involved in the formation of products, and  $n(\text{photons})$  is the number (moles) of incident photons as measured by using a calibrated photodiode. The stoichiometries of the most likely reactions, including the participating electrons/holes, are as follows:

- 1) CH<sub>3</sub>COOH + h<sup>+</sup> + e<sup>-</sup> → CH<sub>4</sub> + CO<sub>2</sub>
- 2) 2 CH<sub>3</sub>COOH + 2 h<sup>+</sup> + 2 e<sup>-</sup> → C<sub>2</sub>H<sub>6</sub> + H<sub>2</sub> + CO<sub>2</sub>
- 3) CH<sub>3</sub>COOH + H<sub>2</sub>O + 2 h<sup>+</sup> + 2 e<sup>-</sup> → CH<sub>3</sub>OH + H<sub>2</sub> + CO<sub>2</sub>
- 4) CH<sub>3</sub>COOH + H<sub>2</sub>O + 4 h<sup>+</sup> + 4 e<sup>-</sup> → HCHO + 2 H<sub>2</sub> + CO<sub>2</sub>
- 5) CH<sub>3</sub>COOH + 2 H<sub>2</sub>O + 6 h<sup>+</sup> + 6 e<sup>-</sup> → HCOOH + 3 H<sub>2</sub> + CO<sub>2</sub>
- 6) CH<sub>3</sub>COOH + 2 H<sub>2</sub>O + 8 h<sup>+</sup> + 8 e<sup>-</sup> → 4 H<sub>2</sub> + 2 CO<sub>2</sub>

from which the electron-to-product ratios are determined as follows:  $[n(e^-)/n(\text{CH}_4)] = 1$  (reaction 1); and  $[n(e^-)/n(\text{H}_2)] = 2$  (reactions 2–6).

<sup>a</sup> Experimental conditions as described in Section S4.2; reaction time: 1 h.

<sup>c</sup> HMS: hexagonal mesoporous silica.

<sup>d</sup> Uncertain amount of copper deposited *in situ* under Hg lamp (1000 W) light irradiation.

References:

- 1 S. Hamid, *PhD Thesis*, Leibniz Universität Hannover, 2018.
- 2 Y.J. Zhang, L. Zhang and S. Li, *Int. J. Hydrogen Energy*, 2010, 35, 438-444.
- 3 H. Harada, T. Ueda and T. Sakata, *J. Phys. Chem.*, 1989, 93, 1542-1548.
- 4 D.I. Kondarides, V.M. Daskalaki, A. Patsoura and X.E. Verykios, *Catal. Lett.*, 2008, 122, 26-32.
- 5 A.V. Korzhak, N.I. Ermokhina, A.L. Stroyuk, V.K. Bukhtiyarov, A.E. Raevskaya, V.I. Litvin, S.Y. Kuchmiy, V.G. Ilyin and P.A. Manorik, *J. Photochem. Photobiol. A-Chem.*, 2008, 198, 126-134.

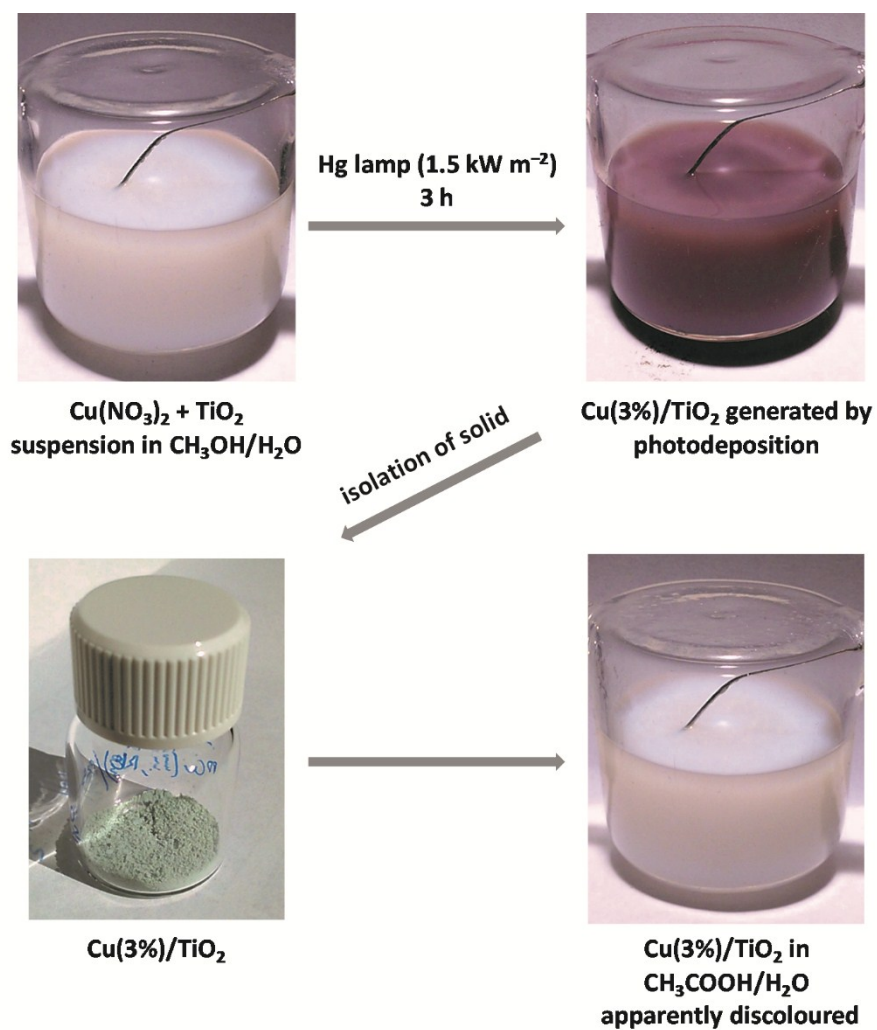

**Fig. S7** Pictures illustrating the colour differences indicative of changes in copper oxidation states. Photodeposition causes colour change from an initial off-white for the suspension containing TiO<sub>2</sub> and the Cu<sup>2+</sup> precursor salt (top left) to an intense purple-pink colouration (top right) consistent with the surface plasmon resonance absorption of deposited Cu(0) nanoparticles. The isolated Cu(3%)/TiO<sub>2</sub> solid changed into a pale blue colouration (bottom left), most likely due to re-oxidation of copper in air (see main text for details). Dispersion of Cu(3%)/TiO<sub>2</sub> in CH<sub>3</sub>COOH/H<sub>2</sub>O resulted in an off-white suspension (bottom right).

**Table S7** Amounts of gaseous products formed during redox cycling experiments by simulated sunlight irradiation of aqueous acetic acid using Cu(3%)/TiO<sub>2</sub> photocatalysts.<sup>a</sup>

| cycle                                           | t/h | produced amounts/ $\mu\text{mol}$ |                 |                 |                               | H <sub>2</sub> /CH <sub>4</sub> |
|-------------------------------------------------|-----|-----------------------------------|-----------------|-----------------|-------------------------------|---------------------------------|
|                                                 |     | H <sub>2</sub>                    | CH <sub>4</sub> | CO <sub>2</sub> | C <sub>2</sub> H <sub>6</sub> |                                 |
| <i>conventional photocatalyst, air-oxidised</i> |     |                                   |                 |                 |                               |                                 |
| #ox1                                            | 1.0 | 0.01                              | 30.7            | 16.4            | 0.1                           | 2 10 <sup>-4</sup>              |
|                                                 | 2.0 | 0.02                              | 57.0            | 30.3            | 0.1                           | 6 10 <sup>-3</sup>              |
|                                                 | 3.0 | 0.02                              | 85.5            | 45.9            | 0.2                           | 2 10 <sup>-4</sup>              |
| <i>photoreduction</i>                           |     |                                   |                 |                 |                               |                                 |
| #red1                                           | 1.0 | 0.30                              | 11.3            | 9.6             | 0.2                           | 0.03                            |
|                                                 | 2.0 | 0.75                              | 16.9            | 13.9            | 0.3                           | 0.04                            |
|                                                 | 3.0 | 1.17                              | 20.5            | 16.2            | 0.3                           | 0.06                            |
| <i>air oxidation</i>                            |     |                                   |                 |                 |                               |                                 |
| #ox2                                            | 1.0 | 0.02                              | 24.1            | 14.0            | 0.2                           | 8 10 <sup>-4</sup>              |
|                                                 | 2.0 | 0.05                              | 48.8            | 27.7            | 0.2                           | 10 <sup>-3</sup>                |
|                                                 | 3.0 | 0.11                              | 68.6            | 39.4            | 0.3                           | 2 10 <sup>-3</sup>              |
| <i>photoreduction</i>                           |     |                                   |                 |                 |                               |                                 |
| #red2                                           | 1.0 | 0.40                              | 4.9             | 5.0             | 0.2                           | 0.08                            |
|                                                 | 2.0 | 0.82                              | 8.5             | 7.1             | 0.2                           | 0.10                            |
|                                                 | 3.0 | 1.32                              | 12.7            | 9.7             | 0.2                           | 0.10                            |

<sup>a</sup> Experimental conditions as described in Table S3 and the redox cycling procedure in Section S4.4.
